# Supplementary material for: Adefovir Dipivoxil as a Therapeutic Candidate for Medullary Thyroid Carcinoma: Targeting RET and STAT3 Proto-Oncogenes
Source: MDPI journal article supplement (doi:10.3390/cancers15072163), 2023-04-05
Supplement: s1 [file s1]

# Supplementary Materials: Adefovir Dipivoxil as a Therapeutic Candidate for Medullary Thyroid Carcinoma: Targeting RET and STAT3 Proto-Oncogenes

Tariq Alqahtani, Vishnu Kumarasamy, Sahar Saleh Alghamdi, Rasha Saad Suliman, Khalid Bin Saleh <sup>2,7</sup>, Mohammed A. Alrashed, Mohammed Aldhaefi and Daekyu Sun

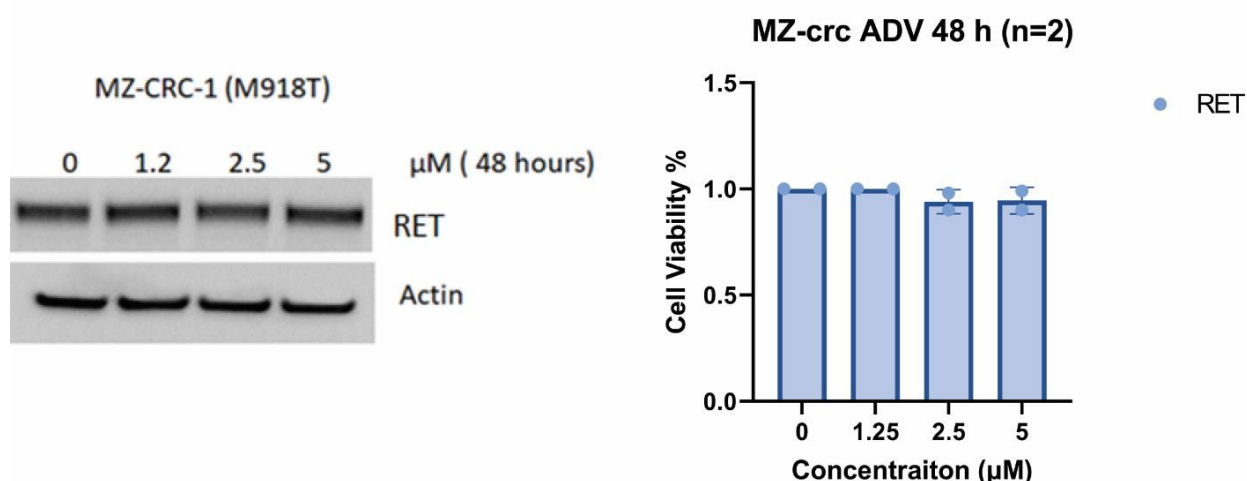

**Figure S1.** The effect of adefovir dipivoxil on MZ-Crc-1 (M918T) after 48 h treatment with various concentration.

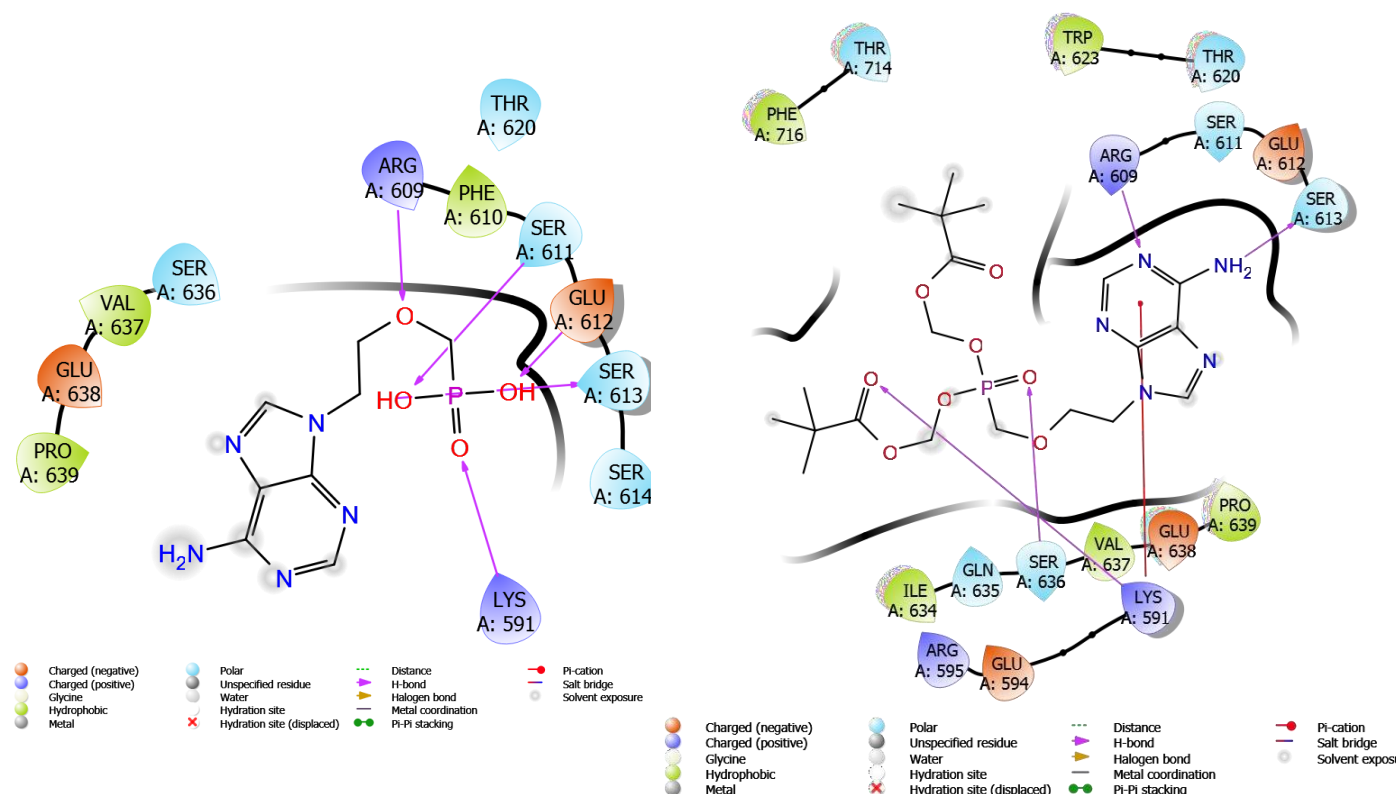

**Figure S2.** The 2D interactions of Adefovir and Adefovir dipivoxil at STAT3 SH2 bindingpocket.

Uncropped Western Blots (Figure S3)

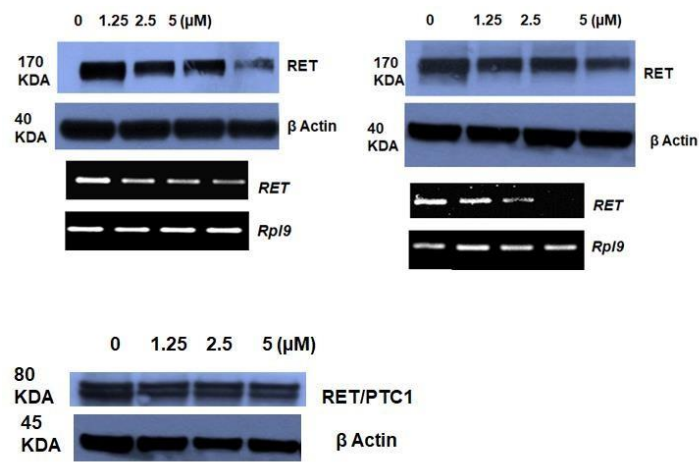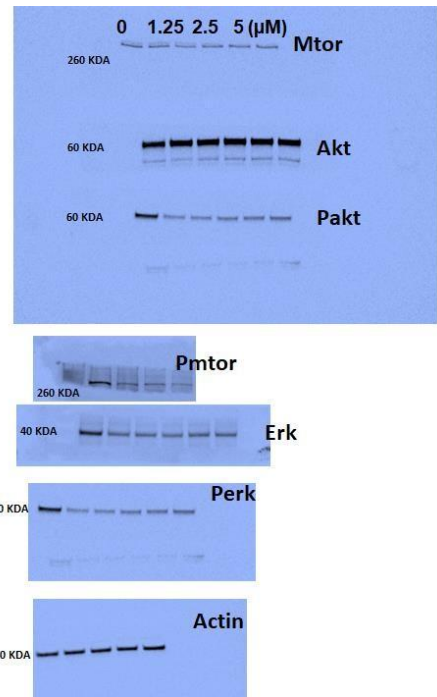

Uncropped Western Blots (Figure S4)

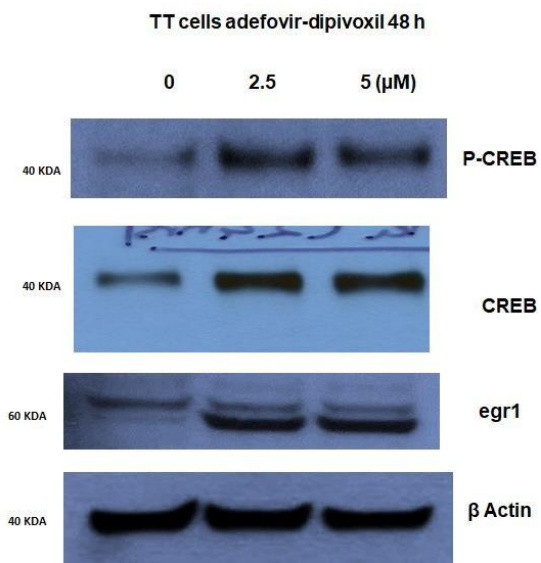

Uncropped Western Blots (Figure S5)

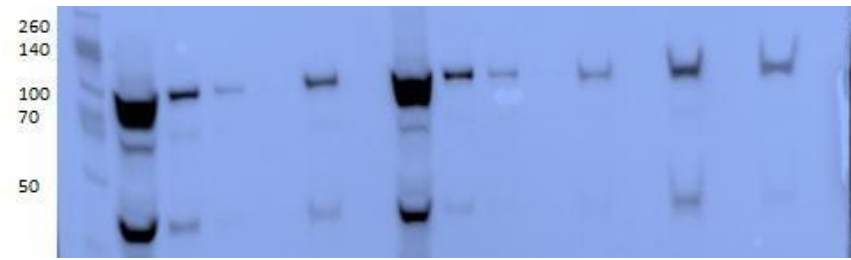

Uncropped Western Blots (Figure S6)

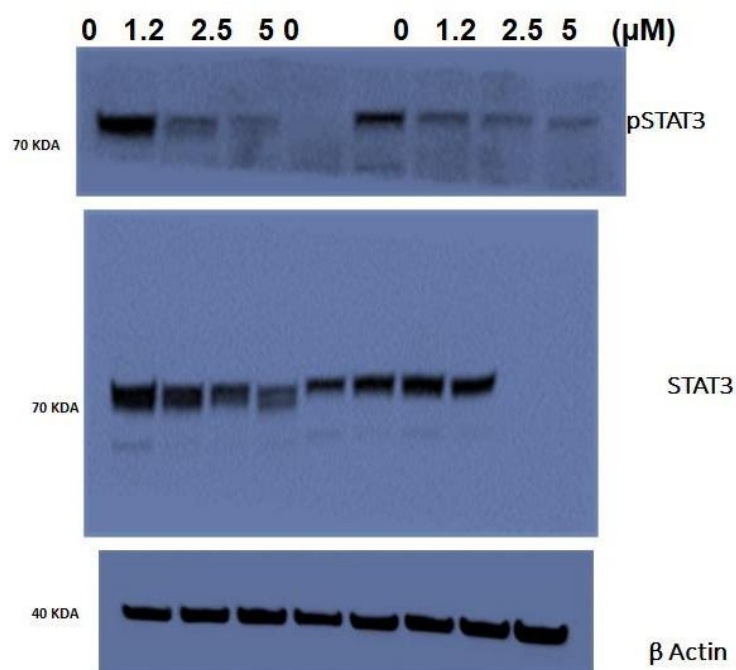

Uncropped Western Blots (Figure S7)

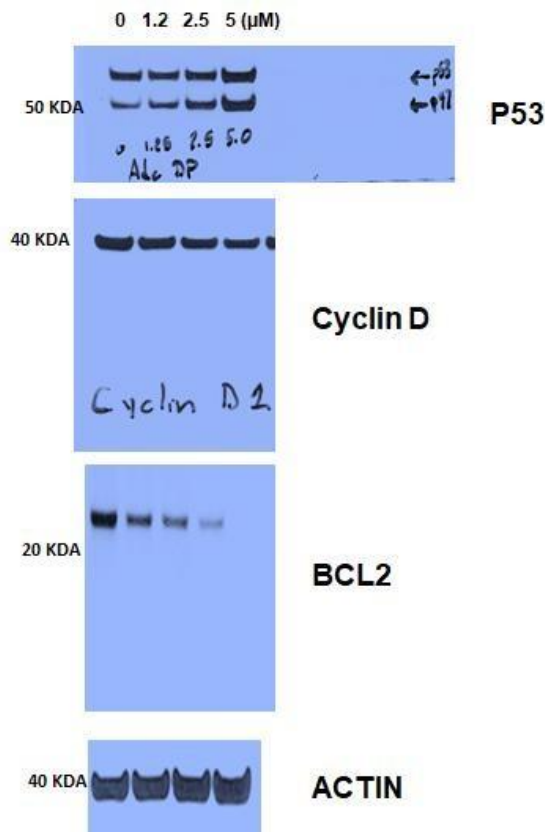

Uncropped Western Blots (Figure S8A)

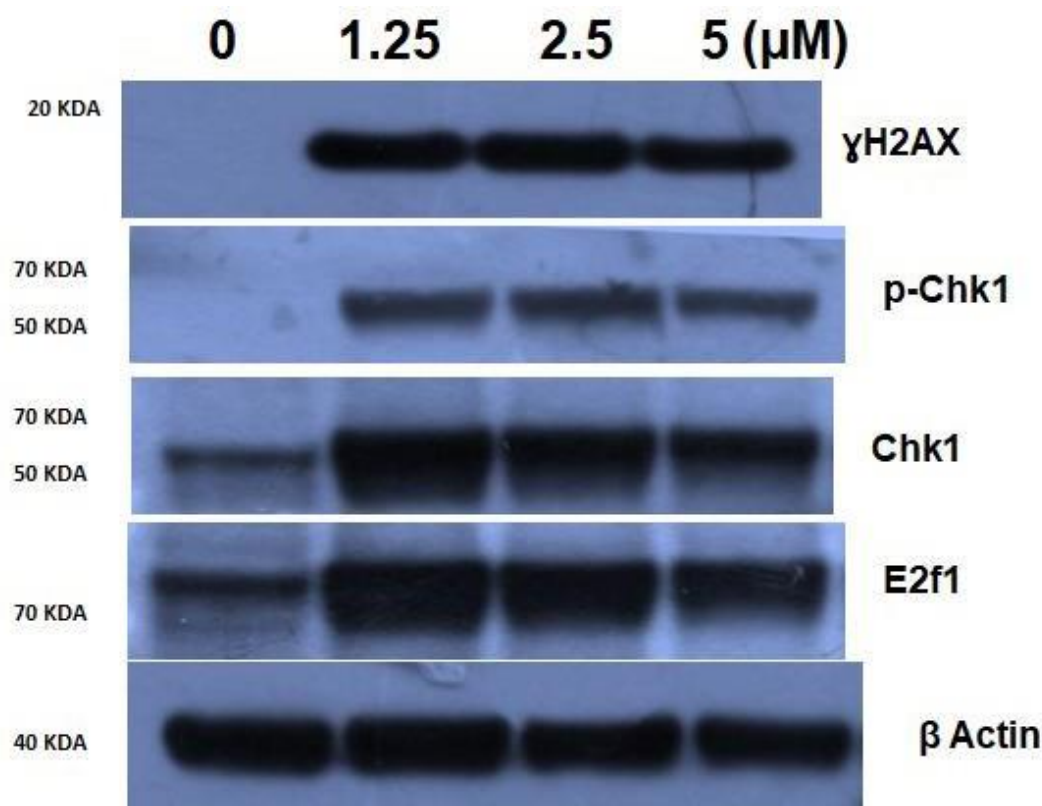

Uncropped Western Blots (Figure S8B)

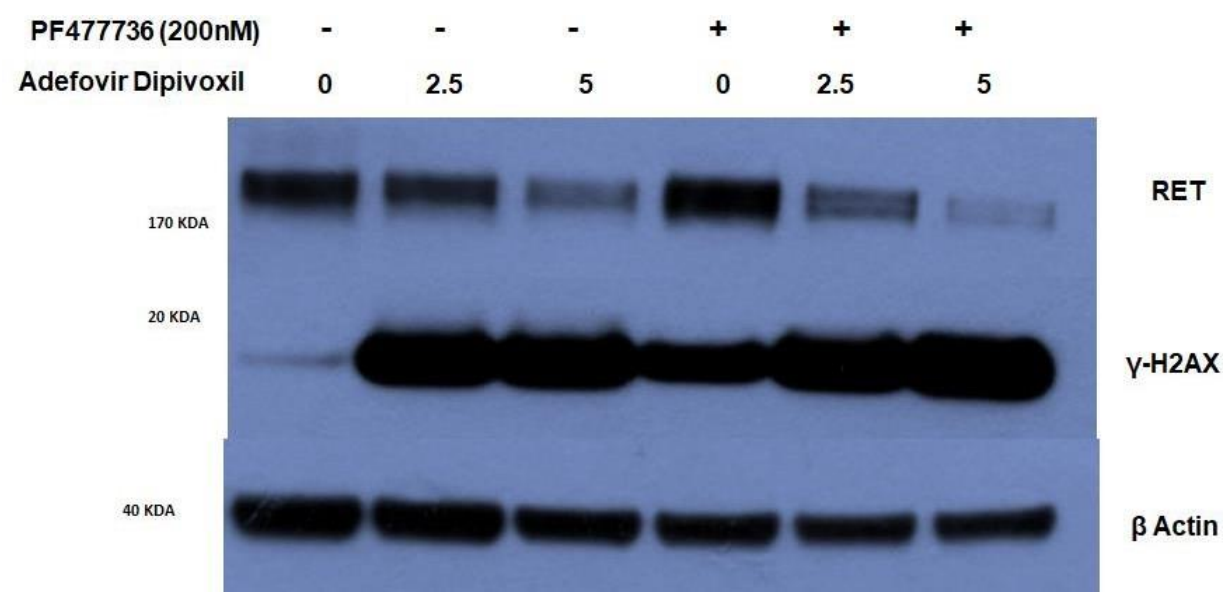

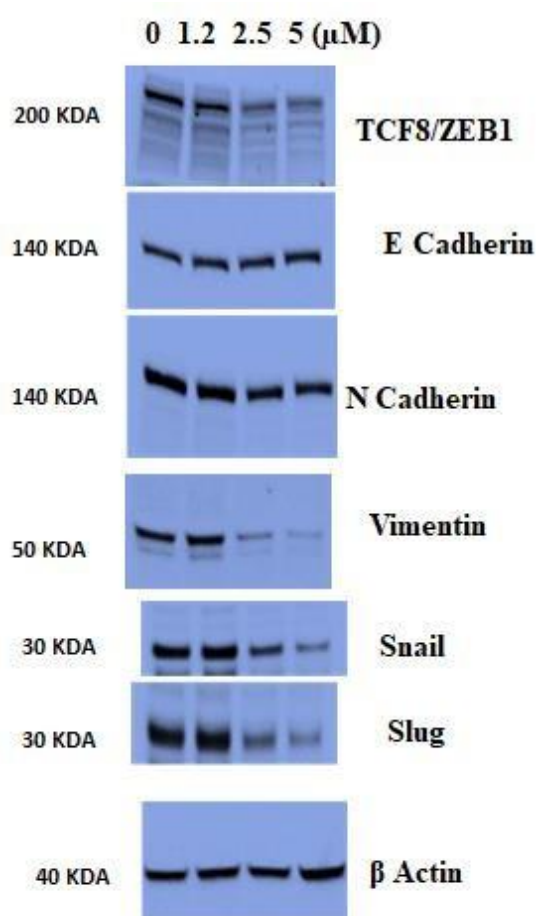

Uncropped Western Blots (Figure S9)
